# Supplementary material for: Acquired cross-linker resistance associated with a novel spliced BRCA2 protein variant for molecular phenotyping of BRCA2 disruption
Source: PubMed Central journal article supplement (PMC5520920; doi:10.1038/cddis.2017.264), 2017-06-15

A

### SB1690CB vs SBRes Network Cluster Hierarchy

|        |       |         |        |        |          |          |        |        |        |           |         |        |         |        |        |         |          |            |          |
|--------|-------|---------|--------|--------|----------|----------|--------|--------|--------|-----------|---------|--------|---------|--------|--------|---------|----------|------------|----------|
| CDK2   | HDAC1 | BRC1A1  | CTN1B1 | BRC1A2 | HSP90AA1 | AR       | UIMC1  | CUL4A  | VCP    | IKBKG     | SMARCC1 | NPM1   | YWHAZ   | UBE2I  | NOTCH1 | SSRP1   | CDC42    | BMI1       | RHOA     |
| CDKN1A | HDAC2 | H2AFX   | BTRC   | RAD51  | HSP90AB1 | NCOR1    | BRC1C3 | CUL4B  | NSFL1C | RIPK1     | SMARCA2 | CDKN2A | TNFAIP3 | SMAD4  | RBP1   | SUPT16H | IQGAP1   | PHC1       | ARHGDA   |
| PCNA   | SIN3A | MDC1    | PSEN1  | BRC1A1 | NR3C1    | HSP90AA1 | BABAM1 | DDR2   | ATXN3  | FADD      | SMARCB1 | NCL    | TNIP1   | PIAS1  | SNW1   | H3F3A   | CALM1    | USP7       | CDC42    |
| RPA1   | RBBP4 | EP300   | SMAD4  | PALB2  | HDAC6    | HSP90AB1 | BRC1A1 | COP53  | UBL4A  | YWHAZ     | SMARCE1 | CDK6   | YWHAQ   | RANBP2 | JAG1   | MCM3    | PAK4     | SFMBT1     | ARHGEF12 |
| RB1    | KDM1A | RPA1    | CDC34  | H2AFX  | HSPA1A   | HSPA4    | MDC1   | C1QB1  | RAD23B | TNFAIP3   | ACTL6A  | LMNA   | IKBKG   | PIAS2  | RUNX3  | MCM4    | ARHGDA   | RYPB       | PLD1     |
| EP300  | RB1   | BRIP1   | YWHAZ  | FANCD2 | FKBP4    | HSPA4    | H2AFX  | TUBB   | UBQLN1 | CYLD      | BMI1    | C1QB1  | MARK3   | SKIL   | TNPO1  | NEK9    | CDC42EP1 | HIST2H2AA3 | BID      |
| SKP2   | EP300 | MRE11A  | EZH2   | MDC1   | HSPA4    | HDAC6    | USP7   | HSPA1A | HSPA4  | TNFRSF10B | KAT5    | YWHAZ  | TRAF3   | DNMT3A | DHX8   | MCM6    | PAK3     | CALM1      | ARHGEF2  |
| CCNB1  | EZH2  | PRKDC   | AR     | RPA1   | UBL4A    | KAT5     | FANCG  | HSPA5  | GTFC34 | TRAF3     | SMARCD2 | UBL4A  | VIM     | GLUL   | DHX15  | MCM5    | LRP6     | PRKRA      | TEC      |
| CCNA1  | WHSC1 | TP53BP1 | MUC1   | FANCG  | SUGT1    | CTN1B1   | EP300  | DCAF4  | YWHAZ  | RIPK3     | BAZ1B   | AURKA  | TRAF1   | BMI1   | GF11B  | FYTTD1  | MYLK     | SOC2       | ITPR1    |
| HDAC1  | YY1   | MLH1    | YAP1   | BLM    | PPP5C    | NR3C1    | PRKDC  | DCAF5  | GTFC5  | YWHAQ     | PBRM1   | PPP1CC | YAP1    | UBE2K  | IPO5   | POLR1A  | PLD1     | YARS2      | BIN1     |

### FA vs Normal Network Cluster Hierarchy

|        |        |        |        |        |       |       |          |        |        |        |          |        |          |          |        |        |       |        |           |
|--------|--------|--------|--------|--------|-------|-------|----------|--------|--------|--------|----------|--------|----------|----------|--------|--------|-------|--------|-----------|
| UBC    | CDK2   | CDK4   | SUMO2  | BARD1  | XRCC6 | RBBP4 | TCEB1    | EZH2   | IRAK1  | CRK    | RCOR1    | CASP3  | RAF1     | MAPK14   | BUB1B  | NBN    | MLH1  | BCL2L1 | MAP1LC3B  |
| SUMO2  | UBC    | SUMO2  | ELAVL1 | BRC1A1 | XRCC5 | HDAC1 | VHL      | EED    | TRAF6  | CBL    | KDM1A    | XIAP   | RALGDS   | MAPK8IP2 | CDC20  | MRE11A | PMS2  | BAD    | GABARAPL2 |
| ELAVL1 | SUMO2  | UBC    | UBC    | RBBP8  | SUMO2 | BCL6  | CUL5     | SUZ12  | IRAK3  | EGFR   | HDAC2    | DTX3   | HRAS     | ATF2     | BUB3   | MDC1   | EXO1  | BAX    | SQSTM1    |
| PCNA   | ELAVL1 | ELAVL1 | SKP2   | UBE2E1 | PRKDC | RCOR1 | CUL2     | PHF1   | MYD88  | BCAR1  | HDAC1    | TBK1   | HSP90AA1 | MAPKAPK2 | CDC27  | RAD50  | BLM   | BAK1   | ATG4B     |
| USP7   | PCNA   | RB1    | CUL1   | UBE2D1 | PARP1 | HDAC2 | TCEB2    | SRSF3  | IRAK4  | GRB2   | KIAA0182 | UBE2E1 | YWHAZ    | MAP2K6   | MAD2L1 | H2AFX  | BRIP1 | BECN1  | ATG7      |
| EIF4A3 | CDKN1A | CEBPE  | EIF4A3 | UBE2D3 | ERG   | YY1   | LAMP2    | JARID2 | TOLLIP | KIT    | SUMO2    | CRYAB  | YWHAQ    | MAP2K3   | CDC23  | TOPBP1 | PMS1  | BCL2L1 | ATG3      |
| PSMA2  | SKP2   | RBBP4  | PSMA2  | NBN    | ILF2  | SUMO2 | HNRNP2B1 | SNRPD1 | PEL1   | PIK3CB | KDM5B    | BIRC2  | YWHAQ    | MKNK1    | CASC5  | ATM    | FAN1  | BID    | NIPSNAP1  |
| SRPK1  | CDK4   | CDK2   | EIF6   | MLH1   | WRN   | KDM5B | HIF1A    | ELAVL1 | IKBKG  | SOS2   | GF11     | CASP9  | MAP2K1   | DUSP10   | ANAPC4 | MLH1   | MSH6  | BIK    | NBR1      |
| TUBB   | CDKN1B | CCND1  | ILF2   | HNRNP1 | MDM2  | EZH2  | ASB9     | SRSF7  | IL1R1  | MUC1   | ZNF217   | CASP8  | KRAS     | DUSP16   | PLK1   | TERF2  | MSH2  | VDAC1  | ULK1      |
| ILF2   | EIF4A3 | USP7   | SHFM1  | SRSF1  | H2AFX | PHB   | HNRNP1   | MTF2   | TAB2   | PIK3R1 | CTBP2    | APAF1  | RPS6KA2  | LRP2     | SNCG   | EP300  | AIFM1 | HRK    | KBTBD7    |

The most central 10 genes of each network cluster ordered from left to right

Overlapping gene

B

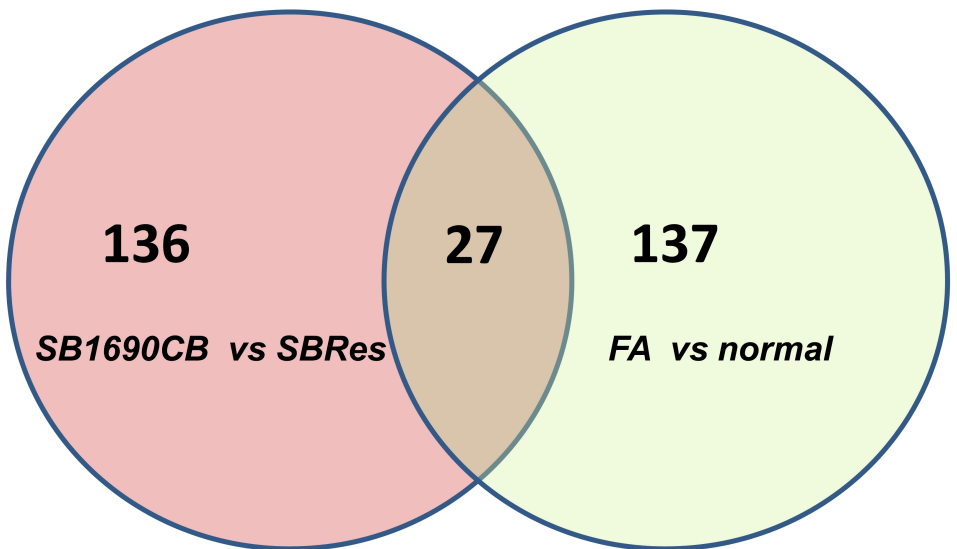

Supplement: cddis2017264x2.pdf [file cddis2017264x2.pdf]
