# Supplementary material for: Acquired cross-linker resistance associated with a novel spliced BRCA2 protein variant for molecular phenotyping of BRCA2 disruption
Source: PubMed Central journal article supplement (PMC5520920; doi:10.1038/cddis.2017.264), 2017-06-15

# Suppl. Figure 1

## A

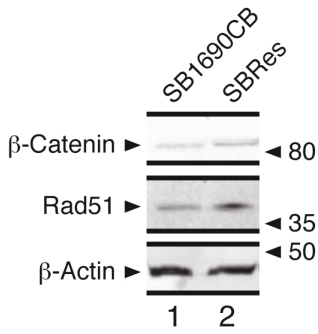

## B

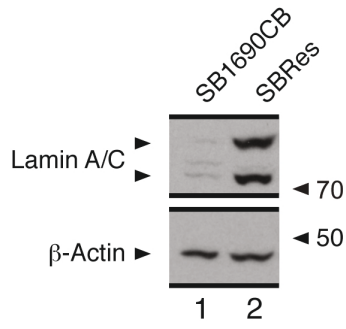

## C

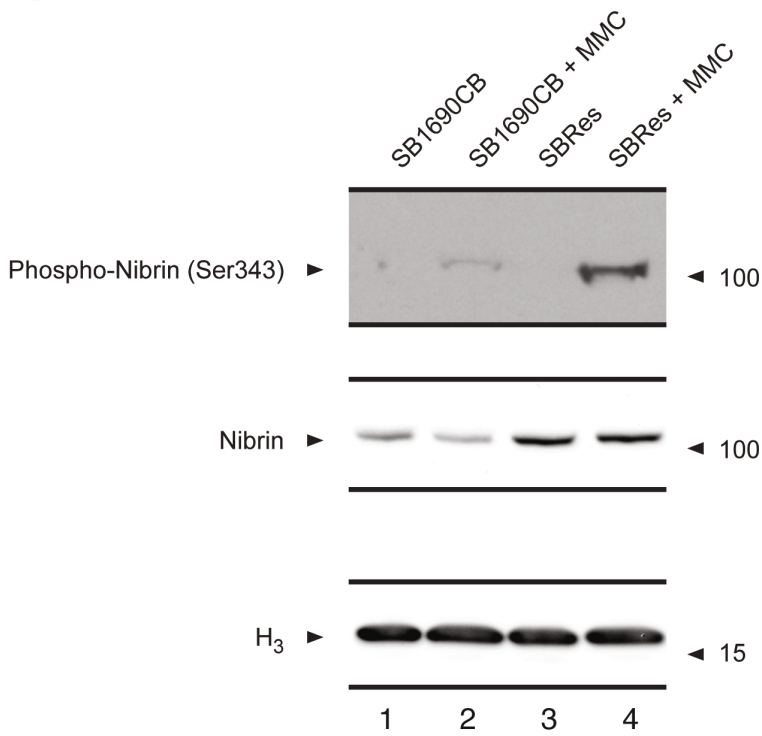

## D

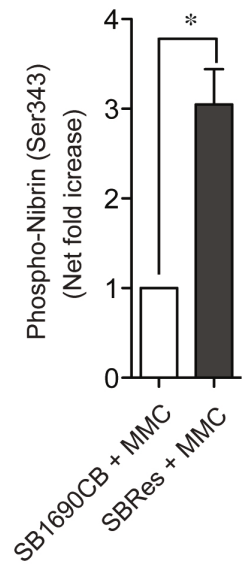

Supplement: cddis2017264x1.pdf [file cddis2017264x1.pdf]
